---

## Erratum

Fahy, W. E. and O'Hara, R. K. Does salinity influence the number of vertebrae developing in fishes? *J. Cons. int. Explor. Mer*, 37: 156–61.

Page 156. Under Materials and methods, line 11, delete 100; to read (one I.U./g body . . .)

Page 157. Under Results, right-hand column at bottom of first paragraph, 0·596; to read 1·68.

Page 157. Bottom line of Table 2, the numerator and denominator in the Equation for  $F$  should be interchanged and the correct value for  $F$  inserted; to read

$$F = \frac{0.441}{0.263} = 1.68$$
